# Supplementary material for: Detection of air and surface contamination by SARS-CoV-2 in hospital rooms of infected patients
Source: Springer Nature journal article supplement (doi:10.1038/s41467-020-16670-2), 2020-05-29
Supplement: 41467_2020_16670_MOESM1_ESM.pdf [file 41467_2020_16670_MOESM1_ESM.pdf]

## **Supplementary Appendix – Chia, et al. Detection of Air and Surface Contamination by SARS-CoV-2 in Hospital Rooms of Infected Patients**

### **Table of Contents:**

1. Supplementary Figure 1 - Single general ward airborne infection isolation room layout showing environmental sites sampled and configuration of air samplers.
2. Supplementary Figure 2: Single intensive care unit room layout showing environmental sites sampled
3. Supplementary Figure 3: Cycle threshold values of both clinical samples and environmental samples against the day of illness.
4. Supplementary Table 1: Characteristics of each room and relevant clinical details
5. Supplementary Table 2: All sites sampled, and the number of rooms sampled per site

**Supplementary Figure 1: Single general ward airborne infection isolation room layout showing environmental sites sampled (top) and configuration of air samplers (bottom).**

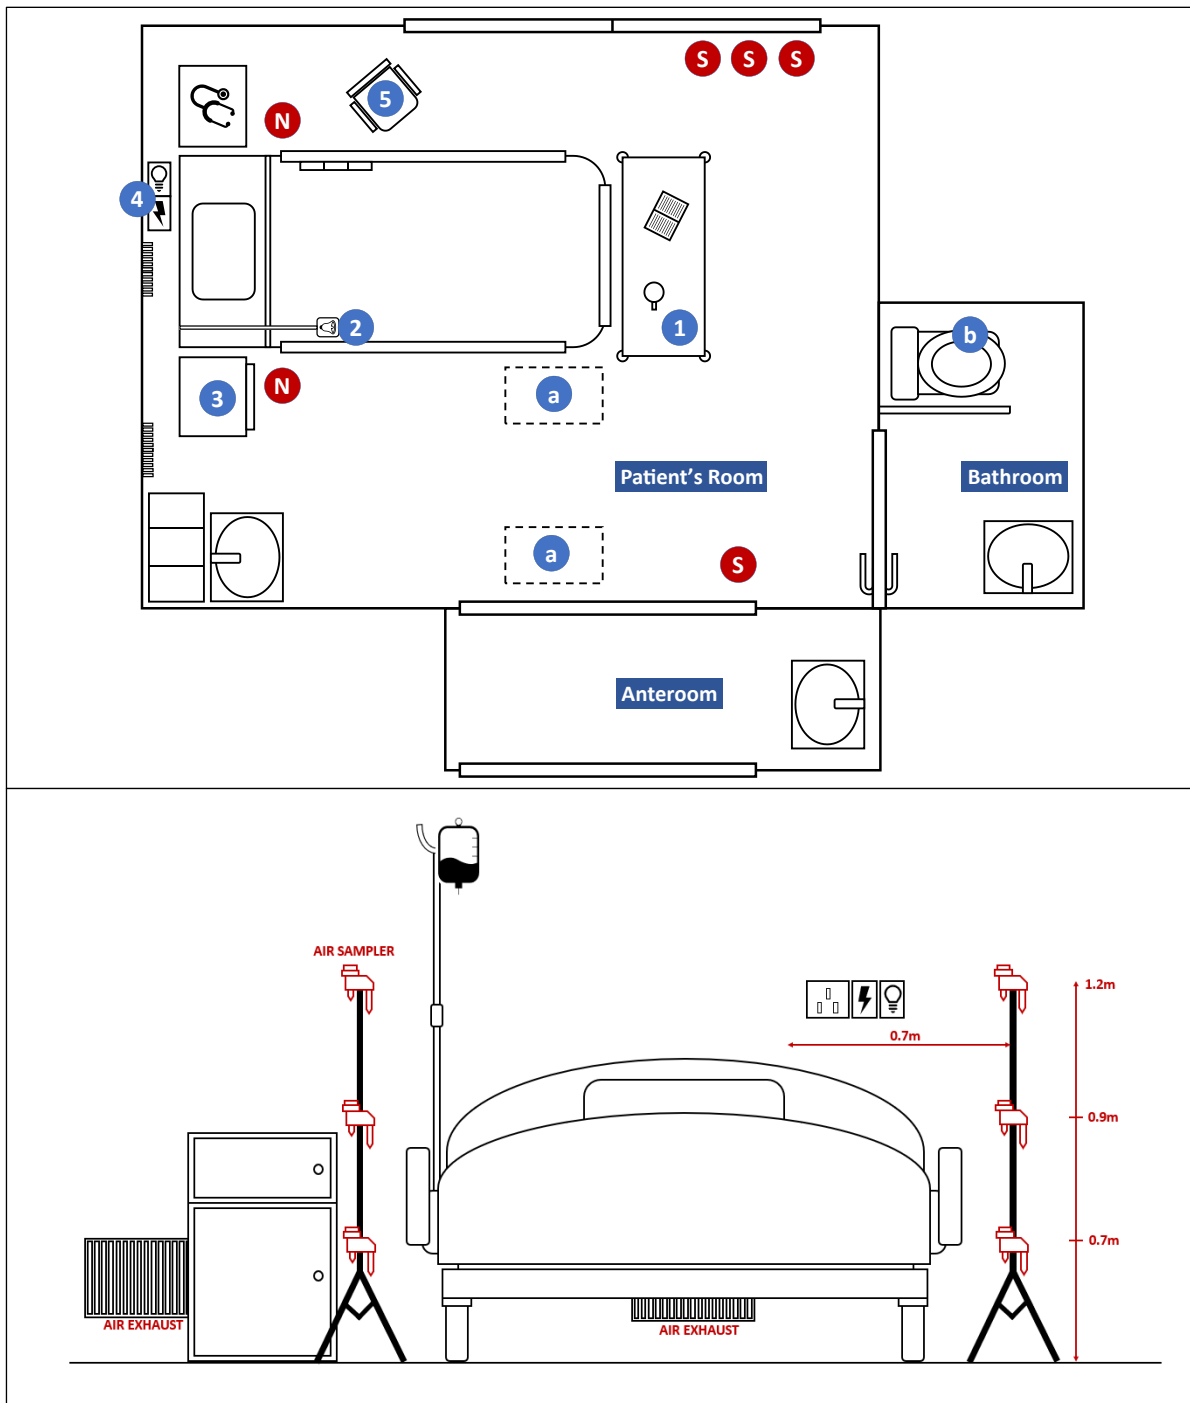

Top: Blue circles mark 5 high-touch areas: (1) cardiac table, (2) bed rail (including call bell), (3) locker, (4) switches, and (5) chair; as well as other key sites sampled: (a) floor, (b) toilet bowl seat. Red circles labelled “N” mark out positions of NIOSH air samplers, while red circles labelled “S” mark out positions of SKC air samplers (only in room 1). During the air sampling duration, patient 1 was seated in the chair while patients 2 and 3 were lying in bed.

Bottom: Configuration of air samplers depicts air sampling layout in rooms 2 and 3 only.

**Supplementary Figure 2: Single intensive care unit room layout showing environmental sites sampled**

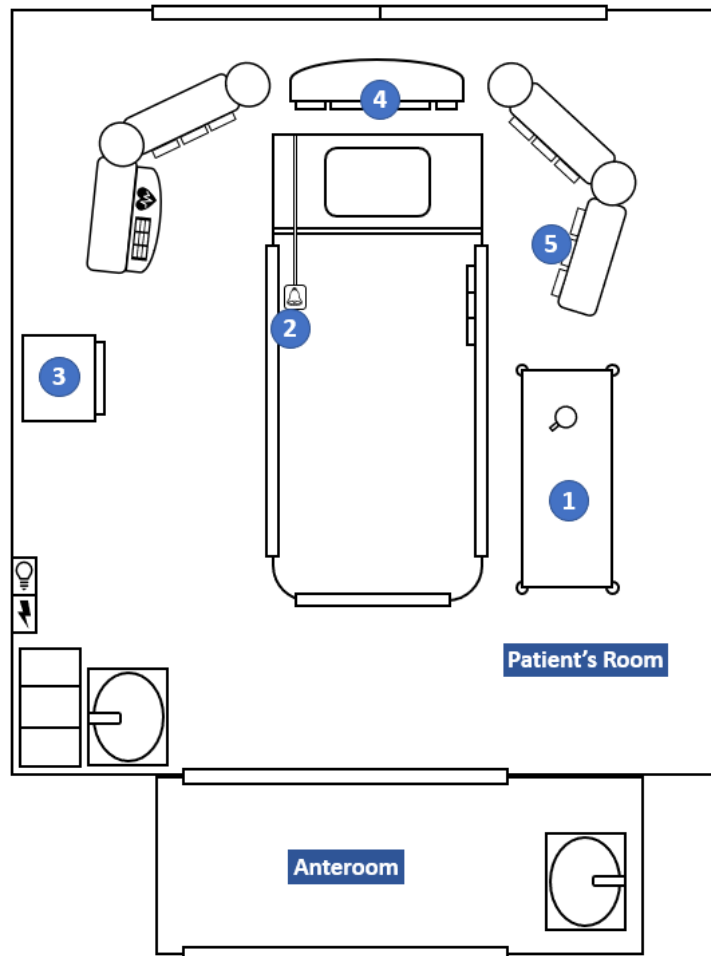

Blue circles mark 5 high-touch areas: (1) cardiac table, (2) bed rail (including call bell), (3) locker, (4) ventilator, and (5) surgical pendants.

**Supplementary Figure 3: Cycle threshold values of both clinical samples and environmental samples against the day of illness.**

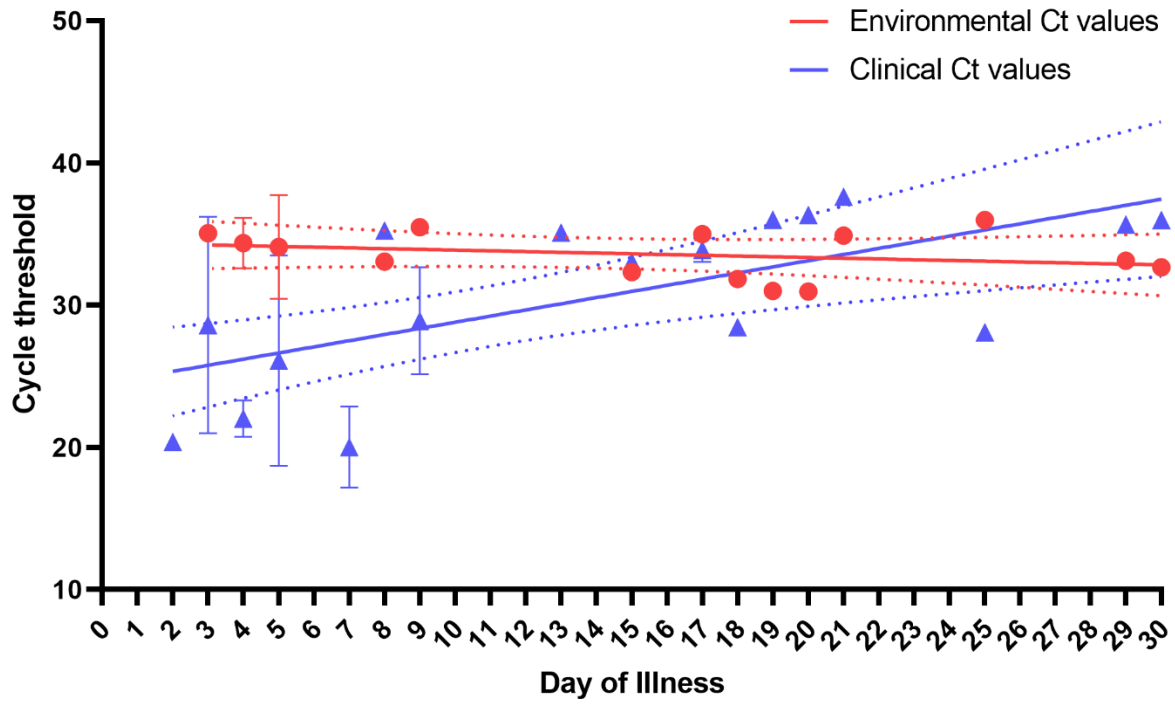

**Supplementary Table 1: Characteristics of each room and relevant clinical details**

| Clinical Characteristics |                             |                   |                |             |                   | Selected Surfaces |          |        |        |       |            |                |       |        | Air Sampling     |                     |                         |
|--------------------------|-----------------------------|-------------------|----------------|-------------|-------------------|-------------------|----------|--------|--------|-------|------------|----------------|-------|--------|------------------|---------------------|-------------------------|
|                          | Symptoms on day of sampling | Supp. O2 required | Day of illness | Day of stay | Clinical Ct Value | Table             | Bed Rail | Locker | Switch | Chair | Ventilator | Infusion pumps | Floor | Toilet | Air exhaust vent | Air sampling result | Particle size fractions |
| 1                        | Cough, nausea, and dyspnea  | No                | 9              | 4           | 33.22             | -                 | -        | -      | -      | -     | Na         | Na             | -     | -      | -                | -                   | Not detected            |
| 2                        | Cough and dyspnea           | No                | 5              | 3           | 18.45             | x                 | x        | x      | x      | x     | Na         | Na             | x     | x      | x                | x                   | >4 µm; 1-4 µm           |
| 3                        | Nil                         | No                | 5              | 4           | 20.11             | x                 | x        | -      | -      | x     | Na         | Na             | -     | x      | x                | x                   | >4 µm; 1-4 µm           |
| 4*                       | Nausea                      | Yes               | 29             | 20          | 35.66             | -                 | -        | -      | Na     | Na    | -          | -              | -     | Na     | Na               | Na                  | Na                      |
| 5*                       | Vomiting                    | Intubated         | 18             | 11          | 28.45             | -                 | -        | -      | Na     | Na    | -          | -              | -     | Na     | Na               | Na                  | Na                      |
| 6*                       | Dyspnea                     | Yes               | 5              | 1           | 29.48             | -                 | -        | -      | Na     | Na    | -          | -              | -     | Na     | -                | Na                  | Na                      |
| 7                        | Nil                         | No                | 30             | 14          | 35.98             | -                 | -        | -      | -      | -     | Na         | Na             | x     | -      | Na               | Na                  | Na                      |
| 8                        | Nil                         | No                | 25             | 19          | 28.09             | -                 | -        | -      | -      | -     | Na         | Na             | -     | -      | Na               | Na                  | Na                      |
| 9                        | Cough                       | No                | 21             | 16          | 37.63             | -                 | -        | -      | -      | -     | Na         | Na             | -     | -      | Na               | Na                  | Na                      |
| 10                       | Cough                       | No                | 20             | 16          | 36.34             | -                 | -        | -      | -      | -     | Na         | Na             | -     | -      | Na               | Na                  | Na                      |
| 11                       | Nil                         | No                | 17             | 15          | 34.48             | -                 | x        | -      | x      | -     | Na         | Na             | -     | -      | Na               | Na                  | Na                      |
| 12                       | Nil                         | No                | 17             | 15          | 33.28             | -                 | -        | x      | x      | -     | Na         | Na             | -     | -      | Na               | Na                  | Na                      |
| 13                       | Cough                       | No                | 19             | 14          | 36                | -                 | -        | -      | -      | -     | Na         | Na             | x     | -      | Na               | Na                  | Na                      |
| 14                       | Fever and cough             | No                | 2              | 1           | 20.37             | -                 | -        | x      | -      | -     | Na         | Na             | x     | -      | Na               | Na                  | Na                      |
| 15                       | Cough                       | Yes               | 15             | 1           | 33.04             | -                 | -        | -      | -      | -     | Na         | Na             | -     | -      | Na               | Na                  | Na                      |
| 16                       | Nil                         | No                | 13             | 8           | 35.09             | -                 | -        | -      | -      | -     | Na         | Na             | -     | -      | Na               | Na                  | Na                      |
| 17                       | Blocked nose and myalgia    | No                | 7              | 3           | 22.04             | x                 | x        | x      | x      | x     | Na         | Na             | x     | x      | Na               | Na                  | Na                      |
| 18                       | Cough                       | No                | 9              | 2           | 26.33             | -                 | -        | -      | -      | -     | Na         | Na             | -     | -      | Na               | Na                  | Na                      |
| 19                       | Fever and sore throat       | No                | 3              | 2           | 30.4              | -                 | -        | -      | -      | -     | Na         | Na             | -     | -      | Na               | Na                  | Na                      |

|    |                                          |    |   |   |       |   |   |   |   |   |    |    |   |   |    |    |    |
|----|------------------------------------------|----|---|---|-------|---|---|---|---|---|----|----|---|---|----|----|----|
| 20 | Cough                                    | No | 3 | 3 | 18.1  | x | x | x | - | x | Na | Na | x | - | Na | Na | Na |
| 21 | Cough                                    | No | 9 | 3 | 27.14 | - | x | - | - | - | Na | Na | - | - | Na | Na | Na |
| 22 | Cough                                    | No | 5 | 3 | 36.75 | x | x | - | - | - | Na | Na | - | - | Na | Na | Na |
| 23 | Fever                                    | No | 3 | 2 | 32.66 | - | - | - | - | - | Na | Na | - | - | Na | Na | Na |
| 24 | Cough                                    | No | 3 | 2 | 37.7  | - | - | - | - | - | Na | Na | x | - | Na | Na | Na |
| 25 | Myalgia                                  | No | 3 | 2 | 24.16 | - | - | - | - | - | Na | Na | - | - | Na | Na | Na |
| 26 | Fever, cough, and sore throat            | No | 4 | 3 | 21.1  | - | x | x | x | - | Na | Na | - | - | Na | Na | Na |
| 27 | Fever, cough, blocked nose, and diarrhea | No | 4 | 3 | 22.92 | x | x | x | - | - | Na | Na | x | - | Na | Na | Na |
| 28 | Fever                                    | No | 7 | 3 | 18.02 | - | - | - | - | x | Na | Na | x | x | Na | Na | Na |
| 29 | Nil                                      | No | 8 | 8 | 35.24 | - | - | - | - | - | Na | Na | x | - | Na | Na | Na |
| 30 | Cough                                    | No | 5 | 3 | 25.69 | x | x | x | x | x | Na | Na | x | x | x  | -  | Na |

x = contamination present  
- = no contamination present  
Na = not applicable

\* ICU rooms. All ICU patients had environmental swabs taken from the ventilator and infusion pumps instead of the electrical switches and toilet. All samples from ICU were all negative.

**Supplementary Table 2: All sites sampled, and the number of rooms sampled per site**

| <b>Environmental Site</b>                        | <b>No. of rooms sampled</b> |
|--------------------------------------------------|-----------------------------|
| <b>Patient room</b>                              |                             |
| Cardiac table                                    | 30                          |
| Bed rail (including control panel and call bell) | 30                          |
| Bedside locker                                   | 30                          |
| Floor                                            | 30                          |
| Chair                                            | 27                          |
| Switches over top of beds                        | 27                          |
| Air exhaust outlet vent                          | 5                           |
| Glass window in the room                         | 5                           |
| Ventilator (ICU)                                 | 3                           |
| Infusion pumps (ICU)                             | 3                           |
| Surgical pendants (ICU)                          | 3                           |
| Vital sign display screen (ICU)                  | 3                           |
| Stethoscope                                      | 3                           |
| Sink, external surface                           | 3                           |
| Sink, internal bowl                              | 3                           |
| Interior of room glass door                      | 3                           |
| PPE storage area over sink                       | 2                           |
| <b>Toilet</b>                                    |                             |
| Toilet seat & automatic flush button             | 27                          |
| Door handle                                      | 2                           |
| Hand rail                                        | 2                           |
| Sink, external surface                           | 2                           |
| Sink, internal bowl                              | 2                           |
